# Supplementary material for: Patient delay and benefit of timely reperfusion in ST-segment elevation myocardial infarction
Source: PubMed Central journal article supplement — Open Heart. 2021 May 5;8(1):e001650. doi: 10.1136/openhrt-2021-001650 (PMC8103948; doi:10.1136/openhrt-2021-001650), 2021-05-05
Supplement: openhrt-2021-001650supp001.pdf [file openhrt-2021-001650supp001.pdf]

Supplemental Table 1: Reduced mortality in PCI-treated STEMI patients with contact-to-balloon times not exceeding 60 min and 120 min, respectively, compared with longer treatment times shown for different categories of symptom duration. Odds ratios and their corresponding 95% confidence intervals are given for the indicated four intervals from symptom onset to first medical contact (S2C).

| Variable                | Contact-to-balloon time<br>(≤60 min vs >60 min) |             | Contact-to-balloon time<br>(≤120 min vs >120 min) |             |
|-------------------------|-------------------------------------------------|-------------|---------------------------------------------------|-------------|
|                         | Odds ratio                                      | 95%-CI      | Odds ratio                                        | 95%-CI      |
| Group 1<br>(S2C≤1h)     | 0.214                                           | 0.149–0.307 | 0.290                                             | 0.252–0.334 |
| Group 2<br>(1h<S2C≤2h)  | 0.564                                           | 0.353–0.901 | 0.332                                             | 0.247–0.446 |
| Group 3<br>(2h<S2C≤6h)  | 0.459                                           | 0.289–0.731 | 0.393                                             | 0.300–0.515 |
| Group 4<br>(6h<S2C≤24h) | 0.616                                           | 0.373–1.018 | 0.452                                             | 0.324–0.632 |

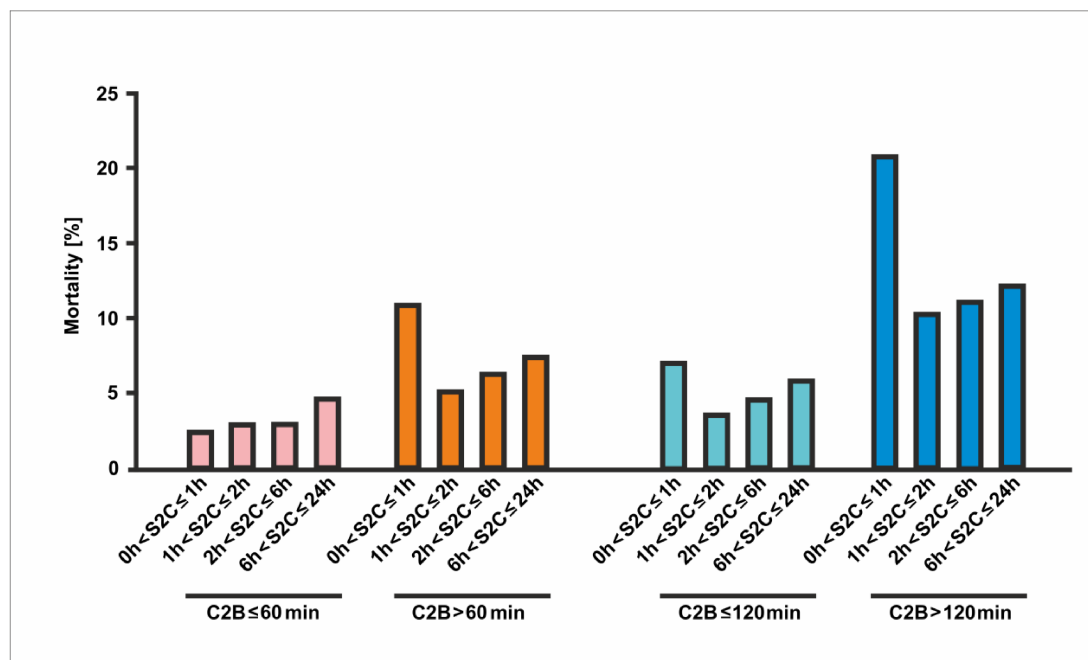

Supplemental Figure 1: Mortality of PCI-treated STEMI patients with different categories of time intervals from symptom onset to first medical contact (S2C) for the indicated contact-to-balloon times of ≤60 min versus >60 min and ≤120 min versus >120 min, respectively.
